# Supplementary material for: c-Myb and its Effector COX-2 as an Indicator Associated with Prognosis and Therapeutic Outcome in Colorectal Cancer
Source: PubMed Central journal article supplement — J Cancer. 2019 Feb 28;10(7):1601–10. doi: 10.7150/jca.27261 (PMC6548004; doi:10.7150/jca.27261), 2019-02-28
Supplement: jcav10p1601s1.pdf [file jcav10p1601s1.pdf]

**Supplementary Table S1** The correlation between the mRNA level of c-Myb or COX-2 and the overall survival in patients with CRC based on the TCGA COAD database

|                        | <b>c-Myb</b>      |         | <b>COX-2</b>      |         |
|------------------------|-------------------|---------|-------------------|---------|
|                        | Log-Rank $\chi^2$ | P-value | Log-Rank $\chi^2$ | P-value |
| All (n = 456)          |                   |         |                   |         |
| Median                 | 0.002279          | 0.9619  | 0.368200          | 0.5440  |
| Mean                   | 0.230800          | 0.6309  | 0.230700          | 0.6310  |
| Stage II/III (n = 318) |                   |         |                   |         |
| Median                 | 0.000129          | 0.9909  | 0.000834          | 0.9770  |
| Mean                   | 0.157400          | 0.6916  | 0.095830          | 0.7569  |

**Supplementary Table S2** Combination of c-Myb mRNA and COX-2 mRNA in predicting prognosis of CRC based on the TCGA COAD database

|                        | <b>Combination 1</b> |         | <b>Combination 2</b> |         |
|------------------------|----------------------|---------|----------------------|---------|
|                        | Log-Rank $\chi^2$    | P-value | Log-Rank $\chi^2$    | P-value |
| All (n = 456)          |                      |         |                      |         |
| Median                 | 0.002170             | 0.9628  | 0.121200             | 0.7278  |
| Mean                   | 0.004392             | 0.9472  | 1.053000             | 0.3049  |
| Stage II/III (n = 318) |                      |         |                      |         |
| Median                 | 0.020470             | 0.8862  | 0.139100             | 0.7092  |
| Mean                   | 0.230000             | 0.6315  | 1.185000             | 0.2763  |

Annotation: Combination 1, (high c-Myb and high COX-2) versus (low c-Myb and low COX-2); Combination 2, (low c-Myb and high COX-2) or (high c-Myb and low COX-2) versus (low c-Myb and low COX-2).
